# Supplementary material for: Identification of Development-Related Genes in the Ovaries of Adult Harmonia axyridis (Pallas) Lady Beetles Using a Time- Series Analysis by RNA-seq
Source: PubMed Central journal article supplement (PMC5155419; doi:10.1038/srep39109), 2016-12-14
Supplement: srep39109-s1.pdf [file srep39109-s1.pdf]

# Identification of Development-Related Genes in the Ovaries of Adult *Harmonia axyridis* (Pallas) Lady Beetles Using a Time- Series Analysis by RNA-seq

WenxiaoDu<sup>1</sup>, Fanrong Zeng<sup>1\*</sup>

**Supplementary information Table 1. GO annotation classification of development-related genes converted to unigenes annotation database of ovaries in *H. axyridis* adult**

| GO ID              | Description                                                    | GeneRatio  | BgRatio      | Pvalue      | Fdr         |
|--------------------|----------------------------------------------------------------|------------|--------------|-------------|-------------|
| Biological Process |                                                                |            |              |             |             |
| GO:0007219         | Notch signaling pathway                                        | 6(35.29%)  | 24(0.25%)    | 1.55E-12    | 8.69E-10    |
| GO:0007166         | cell surface receptor signaling pathway                        | 7(41.18%)  | 176(1.84%)   | 1.06E-08    | 2.98E-06    |
| GO:0050794         | regulation of cellular process                                 | 14(82.35%) | 2090(21.87%) | 1.91E-07    | 3.57E-05    |
| GO:0050789         | regulation of biological process                               | 14(82.35%) | 2273(23.79%) | 5.79E-07    | 8.12E-05    |
| GO:0065007         | biological regulation                                          | 14(82.35%) | 2389(25%)    | 1.12E-06    | 0.000125109 |
| GO:0007165         | signal transduction                                            | 9(52.94%)  | 901(9.43%)   | 6.85E-06    | 0.000640691 |
| GO:0023052         | signaling                                                      | 9(52.94%)  | 1021(10.68%) | 1.92E-05    | 0.001347786 |
| GO:0044700         | single organism signaling                                      | 9(52.94%)  | 1021(10.68%) | 1.92E-05    | 0.001347786 |
| GO:0007154         | cell communication                                             | 9(52.94%)  | 1044(10.93%) | 2.31E-05    | 0.001437517 |
| GO:0051716         | cellular response to stimulus                                  | 9(52.94%)  | 1066(11.16%) | 2.73E-05    | 0.00153374  |
| GO:0050896         | response to stimulus                                           | 10(58.82%) | 1529(16%)    | 7.02E-05    | 0.003581689 |
| GO:0007275         | multicellular organism development                             | 8(47.06%)  | 932(9.75%)   | 8.65E-05    | 0.004045346 |
| GO:0044707         | single-multicellular organism process                          | 8(47.06%)  | 988(10.34%)  | 0.00013138  | 0.005669553 |
| GO:0044767         | single-organism developmental process                          | 8(47.06%)  | 1106(11.57%) | 0.00029166  | 0.01095999  |
| GO:0032501         | multicellular organismal process                               | 8(47.06%)  | 1115(47.67%) | 0.00030869  | 0.01095999  |
| GO:0032502         | developmental process                                          | 8(47.06%)  | 1117(11.69%) | 0.000312584 | 0.01095999  |
| GO:0006355         | regulation of transcription, DNA-templated                     | 6(35.29%)  | 607(6.35%)   | 0.000433129 | 0.012788717 |
| GO:1903506         | regulation of nucleic acid-templated transcription             | 6(35.29%)  | 607(6.35%)   | 0.000433129 | 0.012788717 |
| GO:2001141         | regulation of RNA biosynthetic process                         | 6(35.29%)  | 607(6.35%)   | 0.000433129 | 0.012788717 |
| GO:0051252         | regulation of RNA metabolic process                            | 6(35.29%)  | 623(6.52%)   | 0.000498342 | 0.0139785   |
| GO:0019219         | regulation of nucleobase-containing compound metabolic process | 6(35.29%)  | 637(6.67%)   | 0.000561556 | 0.015001555 |
| GO:0010556         | regulation of macromolecule biosynthetic process               | 6(35.29%)  | 662(6.93%)   | 0.000690038 | 0.016830925 |
| GO:2000112         | regulation of cellular macromolecule biosynthetic process      | 6(35.29%)  | 662(6.93%)   | 0.000690038 | 0.016830925 |
| GO:0009889         | regulation of biosynthetic process                             | 6(35.29%)  | 676(7.07%)   | 0.00077147  | 0.017311776 |
| GO:0031326         | regulation of cellular biosynthetic process                    | 6(35.29%)  | 676(7.07%)   | 0.00077147  | 0.017311776 |
| GO:0051171         | regulation of nitrogen compound metabolic                      | 6(35.29%)  | 697(7.29%)   | 0.000907567 | 0.019582507 |

|                    |                                                                  |           |              |             |             |
|--------------------|------------------------------------------------------------------|-----------|--------------|-------------|-------------|
|                    | process                                                          |           |              |             |             |
| GO:0010468         | regulation of gene expression                                    | 6(35.29%) | 706(7.39%)   | 0.000971352 | 0.020182534 |
| GO:0023014         | signal transduction by protein phosphorylation                   | 2(11.76%) | 28(0.29%)    | 0.001095814 | 0.021955411 |
| GO:0050793         | regulation of developmental process                              | 4(23.53%) | 278(2.91%)   | 0.00123642  | 0.023626208 |
| GO:0006473         | protein acetylation                                              | 2(11.76%) | 32(0.33%)    | 0.001431891 | 0.023626208 |
| GO:0006475         | internal protein amino acid acetylation                          | 2(11.76%) | 32(0.33%)    | 0.001431891 | 0.023626208 |
| GO:0016573         | histone acetylation                                              | 2(11.76%) | 32(0.33%)    | 0.001431891 | 0.023626208 |
| GO:0018393         | internal peptidyl-lysine acetylation                             | 2(11.76%) | 32(0.33%)    | 0.001431891 | 0.023626208 |
| GO:0018394         | peptidyl-lysine acetylation                                      | 2(11.76%) | 32(0.33%)    | 0.001431891 | 0.023626208 |
| GO:0043543         | protein acylation                                                | 2(11.76%) | 35(0.37%)    | 0.001712313 | 0.025590044 |
| GO:0000059         | protein import into nucleus, docking                             | 1(5.88%)  | 1(0.01%)     | 0.001778987 | 0.025590044 |
| GO:0006607         | NLS-bearing protein import into nucleus                          | 1(5.88%)  | 1(0.01%)     | 0.001778987 | 0.025590044 |
| GO:0072697         | protein localization to cell cortex                              | 1(5.88%)  | 1(0.01%)     | 0.001778987 | 0.025590044 |
| GO:1990778         | protein localization to cell periphery                           | 1(5.88%)  | 1(0.01%)     | 0.001778987 | 0.025590044 |
| GO:0001708         | cell fate specification                                          | 2(11.76%) | 39(0.41%)    | 0.00212358  | 0.029783207 |
| GO:0080090         | regulation of primary metabolic process                          | 6(35.29%) | 842(8.81%)   | 0.002434228 | 0.032855302 |
| GO:0007293         | germarium-derived egg chamber formation                          | 2(11.76%) | 42(0.44%)    | 0.002459755 | 0.032855302 |
| GO:0060255         | regulation of macromolecule metabolic process                    | 6(35.29%) | 852(8.92%)   | 0.00258624  | 0.033741407 |
| GO:0031323         | regulation of cellular metabolic process                         | 6(35.29%) | 863(9.03%)   | 0.002761765 | 0.035212498 |
| GO:0036059         | nephrocyte diaphragm assembly                                    | 1(5.88%)  | 2(0.02%)     | 0.003554995 | 0.044318939 |
| Molecular Function |                                                                  |           |              |             |             |
| GO:0004675         | transmembrane receptor protein serine/threonine kinase activity  | 2(12.5%)  | 6(0.05%)     | 2.92E-05    | 0.002894087 |
| GO:0005509         | calcium ion binding                                              | 5(31.25%) | 341(3.08%)   | 8.86E-05    | 0.004223252 |
| GO:0005112         | Notch binding                                                    | 2(12.5%)  | 12(0.11%)    | 0.000127977 | 0.004223252 |
| GO:0019199         | transmembrane receptor protein kinase activity                   | 2(12.5%)  | 14(0.13%)    | 0.000176156 | 0.004359873 |
| GO:0001071         | nucleic acid binding transcription factor activity               | 4(25%)    | 250(2.26%)   | 0.000371971 | 0.006137528 |
| GO:0003700         | transcription factor activity, sequence-specific DNA binding     | 4(25%)    | 250(2.26%)   | 0.000371971 | 0.006137528 |
| GO:0004402         | histone acetyltransferase activity                               | 2(12.5%)  | 29(0.26%)    | 0.000776061 | 0.009603757 |
| GO:0061733         | peptide-lysine-N-acetyltransferase activity                      | 2(12.5%)  | 29(0.26%)    | 0.000776061 | 0.009603757 |
| GO:0034212         | peptide N-acetyltransferase activity                             | 2(12.5%)  | 32(0.29%)    | 0.000945702 | 0.010402727 |
| GO:0033829         | O-fucosylpeptide 3-beta-N-acetylglucosaminyltransferase activity | 1(6.25%)  | 1(0.01%)     | 0.001444174 | 0.014297319 |
| GO:0008080         | N-acetyltransferase activity                                     | 2(12.5%)  | 46(0.42%)    | 0.001950272 | 0.017552449 |
| GO:0016407         | acetyltransferase activity                                       | 2(12.5%)  | 50(0.45%)    | 0.002300537 | 0.018979428 |
| GO:0016410         | N-acyltransferase activity                                       | 2(12.5%)  | 58(0.52%)    | 0.003083494 | 0.023481993 |
| GO:0046872         | metal ion binding                                                | 8(50%)    | 1975(17.83%) | 0.003321355 | 0.023486722 |
| GO:0043169         | cation binding                                                   | 8(50%)    | 1996(18.02%) | 0.003558858 | 0.023488463 |
| GO:0038023         | signaling receptor activity                                      | 3(18.75%) | 256(2.31%)   | 0.005464012 | 0.027177724 |
| GO:0008320         | protein transmembrane transporter activity                       | 1(6.25%)  | 4(0.04%)     | 0.005764972 | 0.027177724 |
| GO:0019955         | cytokine binding                                                 | 1(6.25%)  | 4(0.04%)     | 0.005764972 | 0.027177724 |

|                    |                                                             |            |              |             |             |
|--------------------|-------------------------------------------------------------|------------|--------------|-------------|-------------|
| GO:0022884         | macromolecule transmembrane transporter activity            | 1(6.25%)   | 4(0.04%)     | 0.005764972 | 0.027177724 |
| GO:0050699         | WW domain binding                                           | 1(6.25%)   | 4(0.04%)     | 0.005764972 | 0.027177724 |
| GO:0070379         | high mobility group box 1 binding                           | 1(6.25%)   | 4(0.04%)     | 0.005764972 | 0.027177724 |
| GO:0005024         | transforming growth factor beta-activated receptor activity | 1(6.25%)   | 5(0.05%)     | 0.007201338 | 0.032406023 |
| GO:0008375         | acetylglucosaminyltransferase activity                      | 1(6.25%)   | 7(0.06%)     | 0.010068237 | 0.043337195 |
| Cellular Component |                                                             |            |              |             |             |
| GO:0016020         | membrane                                                    | 13(81.25%) | 2457(42.48%) | 0.001812643 | 0.107363878 |
| GO:0005917         | nephrocyte diaphragm                                        | 1(6.25%)   | 2(0.03%)     | 0.005525328 | 0.107363878 |
| GO:0036056         | filtration diaphragm                                        | 1(6.25%)   | 2(0.03%)     | 0.005525328 | 0.107363878 |
| GO:0005912         | adherens junction                                           | 2(12.5%)   | 45(0.78%)    | 0.0066274   | 0.107363878 |
| GO:0070161         | anchoring junction                                          | 2(12.5%)   | 45(0.78%)    | 0.0066274   | 0.107363878 |
| GO:0005768         | endosome                                                    | 2(12.5%)   | 53(0.92%)    | 0.009106767 | 0.117199631 |
| GO:0005911         | cell-cell junction                                          | 2(12.5%)   | 56(0.97%)    | 0.010128363 | 0.117199631 |
| GO:0070765         | gamma-secretase complex                                     | 1(6.25%)   | 6(0.1%)      | 0.01649023  | 0.166963582 |
| GO:0044425         | membrane part                                               | 9(56.25%)  | 1683(29.1%)  | 0.020868816 | 0.177633651 |
| GO:0005913         | cell-cell adherens junction                                 | 1(6.25%)   | 8(0.14%)     | 0.02193008  | 0.177633651 |
| GO:0055037         | recycling endosome                                          | 1(6.25%)   | 12(0.21%)    | 0.032725265 | 0.219472754 |
| GO:0030139         | endocytic vesicle                                           | 1(6.25%)   | 15(0.26%)    | 0.040748239 | 0.219472754 |
| GO:0005634         | nucleus                                                     | 7(43.75%)  | 1271(21.97%) | 0.042686369 | 0.219472754 |
| GO:0044459         | plasma membrane part                                        | 3 (18.75%) | 291(5.03%)   | 0.043377148 | 0.219472754 |
| GO:0005643         | nuclear pore                                                | 1 (6.25%)  | 16(0.28%)    | 0.04340867  | 0.219472754 |
| GO:0035003         | subapical complex                                           | 1(6.25%)   | 16(0.28%)    | 0.04340867  | 0.219472754 |
| GO:0005770         | late endosome                                               | 1(6.25%)   | 17(0.29%)    | 0.046062183 | 0.219472754 |
| GO:0030054         | cell junction                                               | 13(81.25%) | 2457(42.48%) | 0.054512175 | 0.245304786 |

**Supplementary information Table 2. KEGG pathway annotation of development-related genes converted to unigenes annotation database of ovaries in *H. axyridis* adult**

| Pathway                                              | DEGs genes with pathway annotation | All genes with pathway annotation | Pvalue   | Qvalue   | Pathway ID |
|------------------------------------------------------|------------------------------------|-----------------------------------|----------|----------|------------|
| Notch signaling pathway                              | 7 (53.85%)                         | 62 (1.29%)                        | 0.000000 | 0.000000 | ko043302   |
| FoxO signaling pathway                               | 5 (38.46%)                         | 125 (2.6%)                        | 0.000012 | 0.000077 | ko040683   |
| mTOR signaling pathway                               | 4 (30.77%)                         | 75 (1.56%)                        | 0.000035 | 0.000151 | ko041504   |
| Longevity regulating pathway - multiple species      | 4 (30.77%)                         | 94 (1.95%)                        | 0.000085 | 0.000276 | ko042135   |
| Insulin resistance                                   | 4 (30.77%)                         | 104 (2.16%)                       | 0.000126 | 0.000328 | ko049316   |
| Jak-STAT signaling pathway                           | 3 (23.08%)                         | 43 (0.89%)                        | 0.000178 | 0.000386 | ko046307   |
| TGF-beta signaling pathway                           | 3 (23.08%)                         | 79 (1.64%)                        | 0.001079 | 0.002005 | ko043508   |
| Dorso-ventral axis formation                         | 2 (15.38%)                         | 56 (1.16%)                        | 0.009542 | 0.015506 | ko043209   |
| AGE-RAGE signaling pathway in diabetic complications | 2 (15.38%)                         | 60 (1.25%)                        | 0.010901 | 0.015746 | ko0493310  |
